# Supplementary material for: Towards efficient CO2RR electrocatalysts: a study of structure and properties of M–N–E active moieties embedded in a biphenylene framework (M = Mn, Fe, Co, Ni, Cu; E = C, B)
Source: Royal Society of Chemistry journal article supplement (doi:10.1039/d4ta05064a), 2024-01-01
Supplement: d4ta05064a1.pdf [file d4ta05064a1.pdf]

## *Supplementary Information*

# **Towards Efficient CO<sub>2</sub>RR Electrocatalysts: A Study of Structure and Properties of M–N–E Active Moieties Embedded in Biphenylene Framework (M = Mn, Fe, Co, Ni, Cu; E = C, B)**

Zhengqin Zhao,<sup>a</sup> Andrey V. Zibarev,<sup>b</sup> Hui Wang,<sup>a,\*</sup> Jinbo Hao<sup>c</sup> and Lijia Luo<sup>a</sup>

<sup>a</sup> School of Physical Science and Technology, Southwest Jiaotong University, Chengdu 610031, P. R. China. E-mail: wanghui@swjtu.edu.cn (H. Wang)

<sup>b</sup> Institute of Organic Chemistry, Siberian Branch of the Russian Academy of Sciences, 630090 Novosibirsk, Russia

<sup>c</sup> School of Science, Xi'an University of Architecture and Technology, Xi'an 710055, Shaanxi, China

### **Contents**

#### **1. Figures**

**Figure S1.** The differential charge density diagram of CO<sub>2</sub> adsorbed at the M–B–C-, M–N–C-, and M–N–B-modified BPN monolayers (M = Mn, Fe, Co, Ni, Cu).

**Figure S2.** The free energy diagrams of two-electron reaction coordinate for the M–B–C, M–N–C, and M–N–B active moieties.

**Figure S3.** The free energy diagrams for the two-electron reaction coordinate for various active moieties with M = Mn, Co, Ni, and Cu.

**Figure S4.** The free energy diagrams of the CO<sub>2</sub>RR reaction coordinate for the M–B–C, M–N–C and M–N–B (M=Mn, Fe, Co, Ni, Cu) active moieties.

**Figure S5.** Optimal reaction coordinates for the production of CH<sub>3</sub>OH and CH<sub>4</sub> from metal center atoms M (M = Mn, Fe, Co, Ni, and Cu) with different coordination environments.

**Figure S6.** The solid-state electron-energy band diagrams for the M–B–C, M–N–C, and M–N–B-modified BPN monolayers.

**Figure S7.** The projected DOS of the M–B–C, M–N–C, and M–N–B active moieties featuring the centers of electric-energy bands originated from d-AOs of the M atoms.

**Figure S8.** The COHP diagrams for the M–N–B active moieties with adsorbed CHO\* and COH\*.

#### **2. Tables**

**Table S1.** Calculated energy, zero-point energy correction, enthalpy correction, and entropy contribution of free molecules.

**Table S2.** Calculated energy, zero-point energy correction, enthalpy correction, and entropy contribution of adsorbed molecules.

**Table S3.** The potential limiting step and corresponding limiting potential  $U_L$  (V) of the CO<sub>2</sub>RR on the M–N–C, M–B–C, and M–N–B active moieties.

**Table S4.** Bader charges and CTs in the M–N–E-modified BPN frameworks.

**Table S5.** The bonding energy for hydrogen adsorption of various active moieties in M–B–C, M–N–C and M–N–B (M= Mn, Fe, Co, Ni, Cu).

**Table S6.** The optimized configurations and Gibbs free energy  $\Delta G$  (eV) of reactants and intermediates adsorbed at the Fe–N–B active moiety, as well as the SBIs lengths between intermediates and B (Å).

## 1. Figures

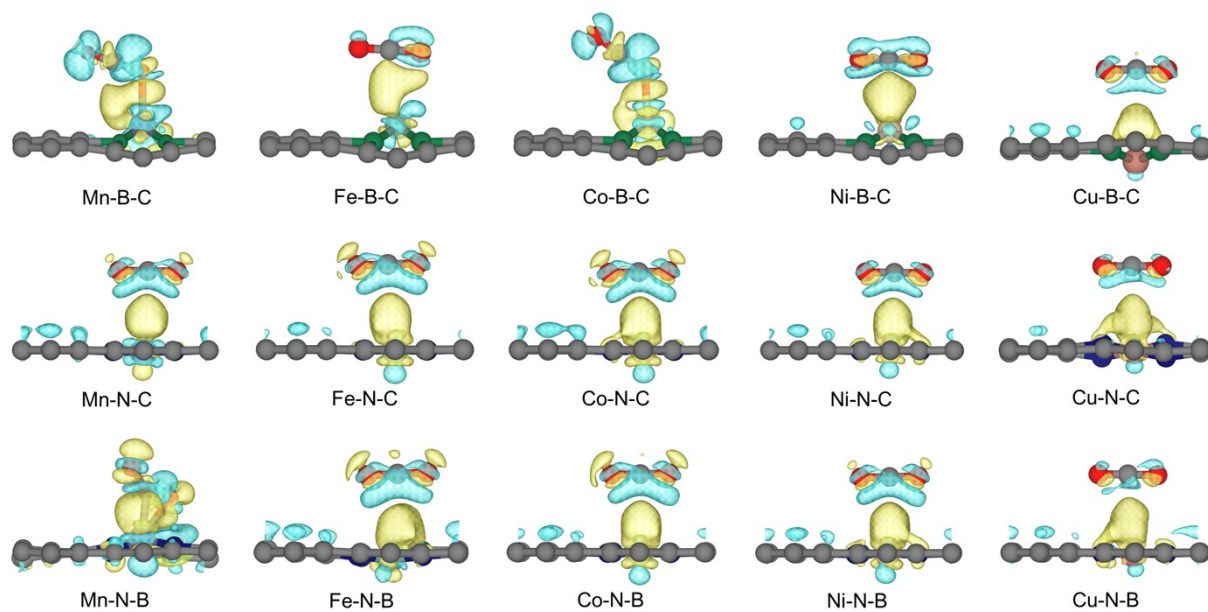

**Figure S1.** The differential charge density diagram of CO<sub>2</sub> adsorbed at the M-B-C-, M-N-C-, and M-N-B-modified BPN monolayers (M = Mn, Fe, Co, Ni, Cu). Color code: yellow, charge accumulation; cyan, charge depletion. The isosurface  $\rho = 0.00025 \text{ e Bohr}^{-3}$ .

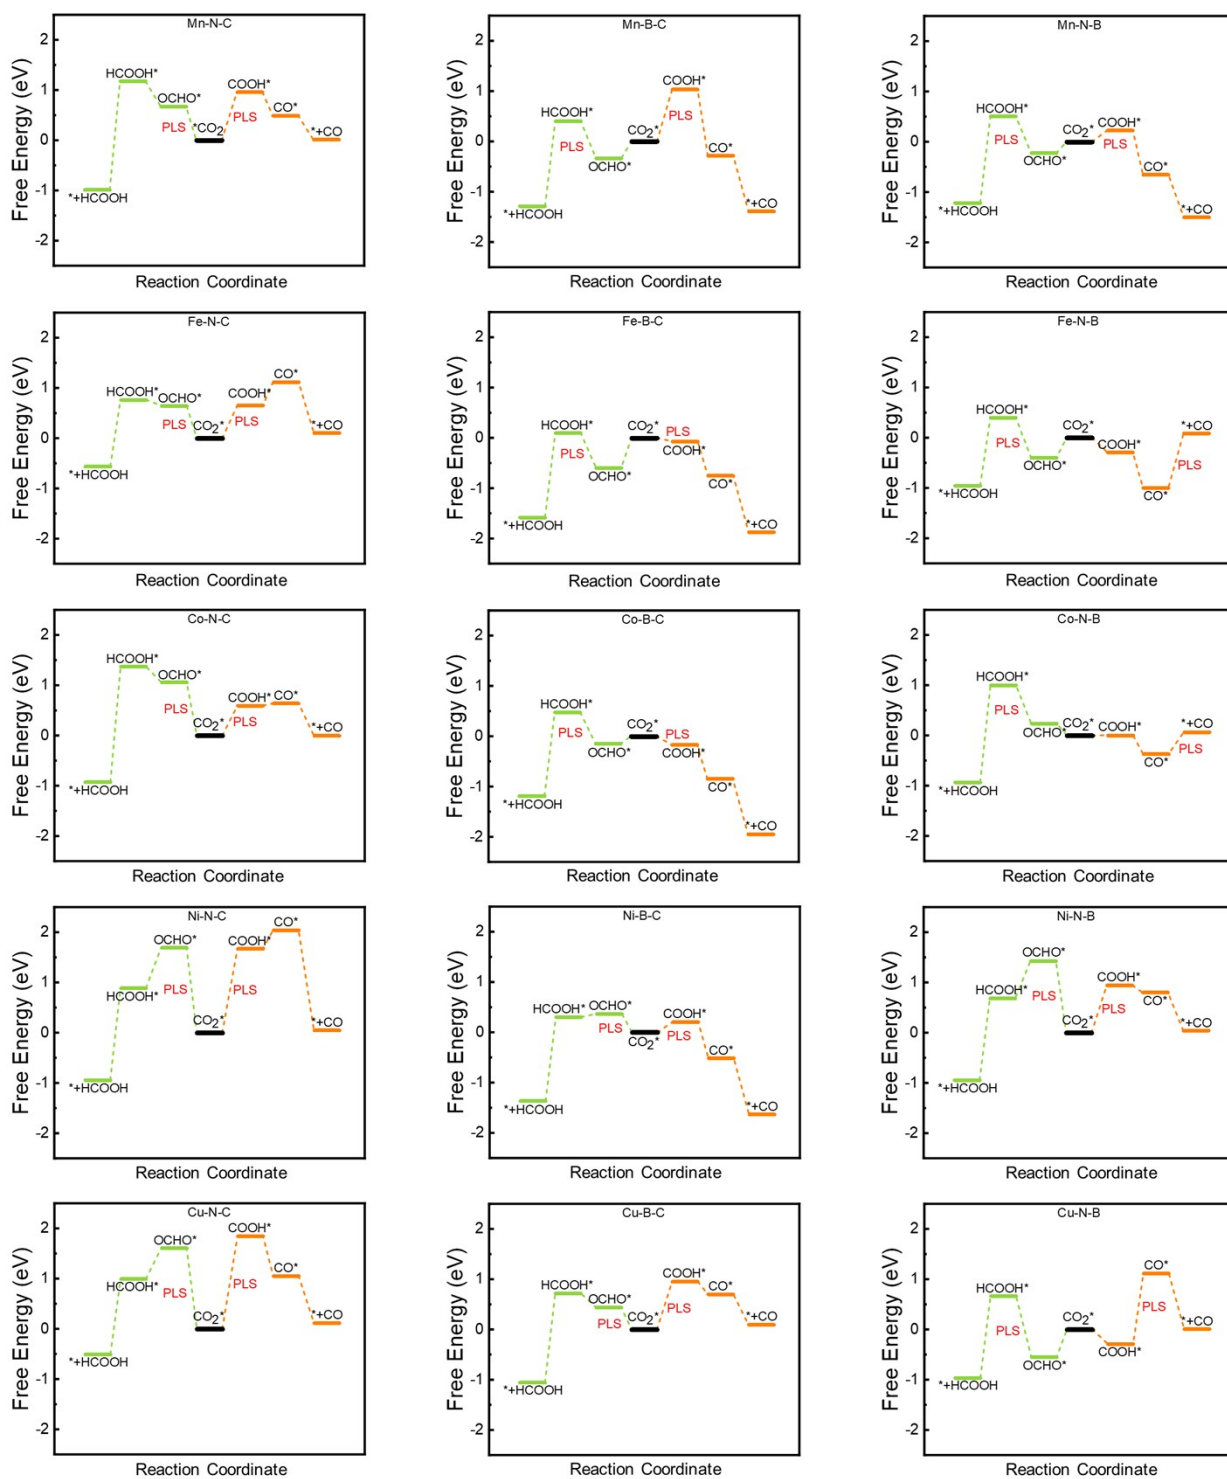

**Figure S2.** The free energy diagrams of two-electron reaction coordinate for the M–B–C, M–N–C, and M–N–B active moieties.

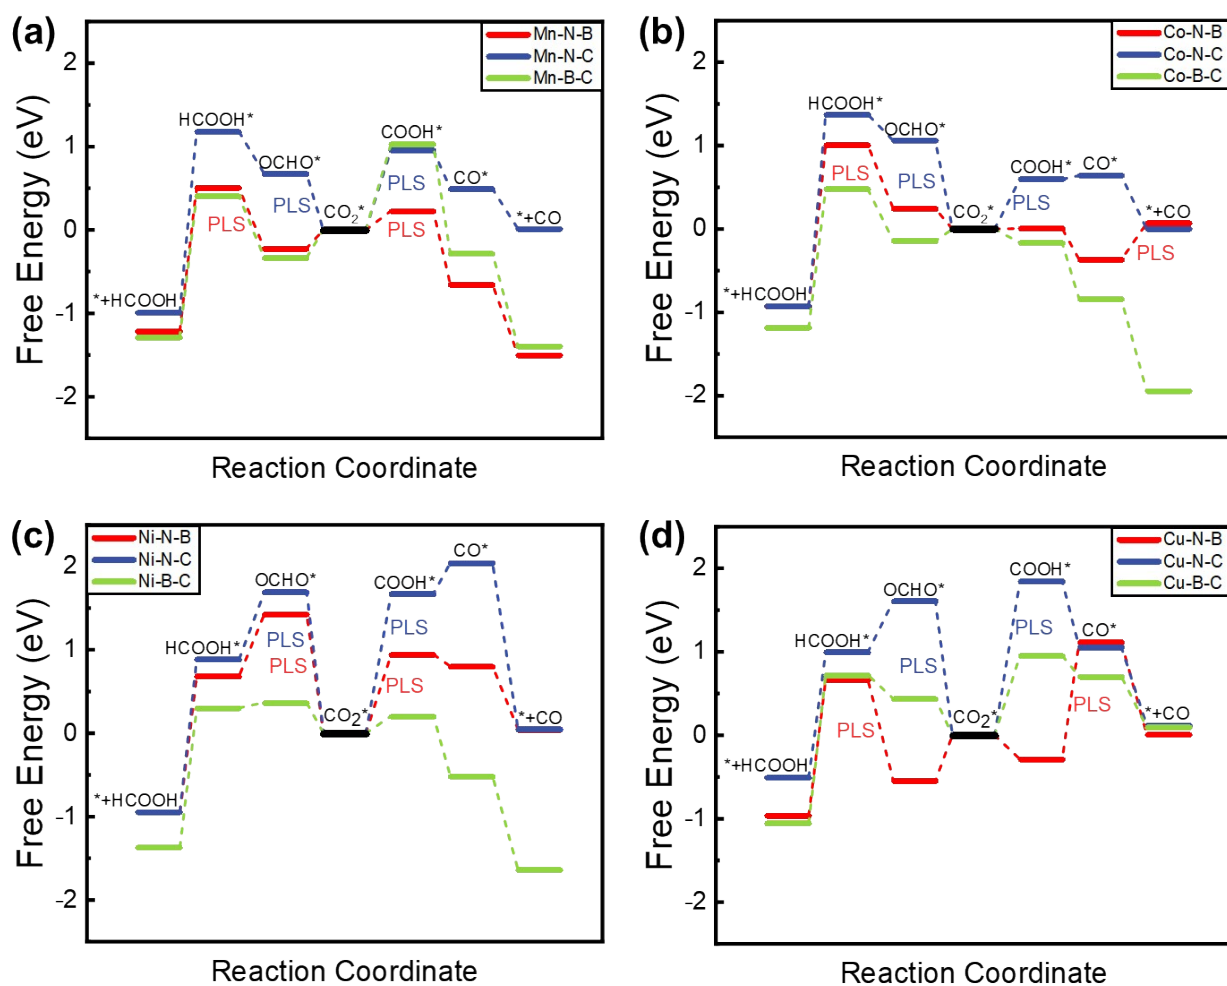

**Figure S3.** The free energy diagrams for the two-electron reaction coordinate for various active moieties with  $M = \text{Mn, Co, Ni, and Cu}$ .

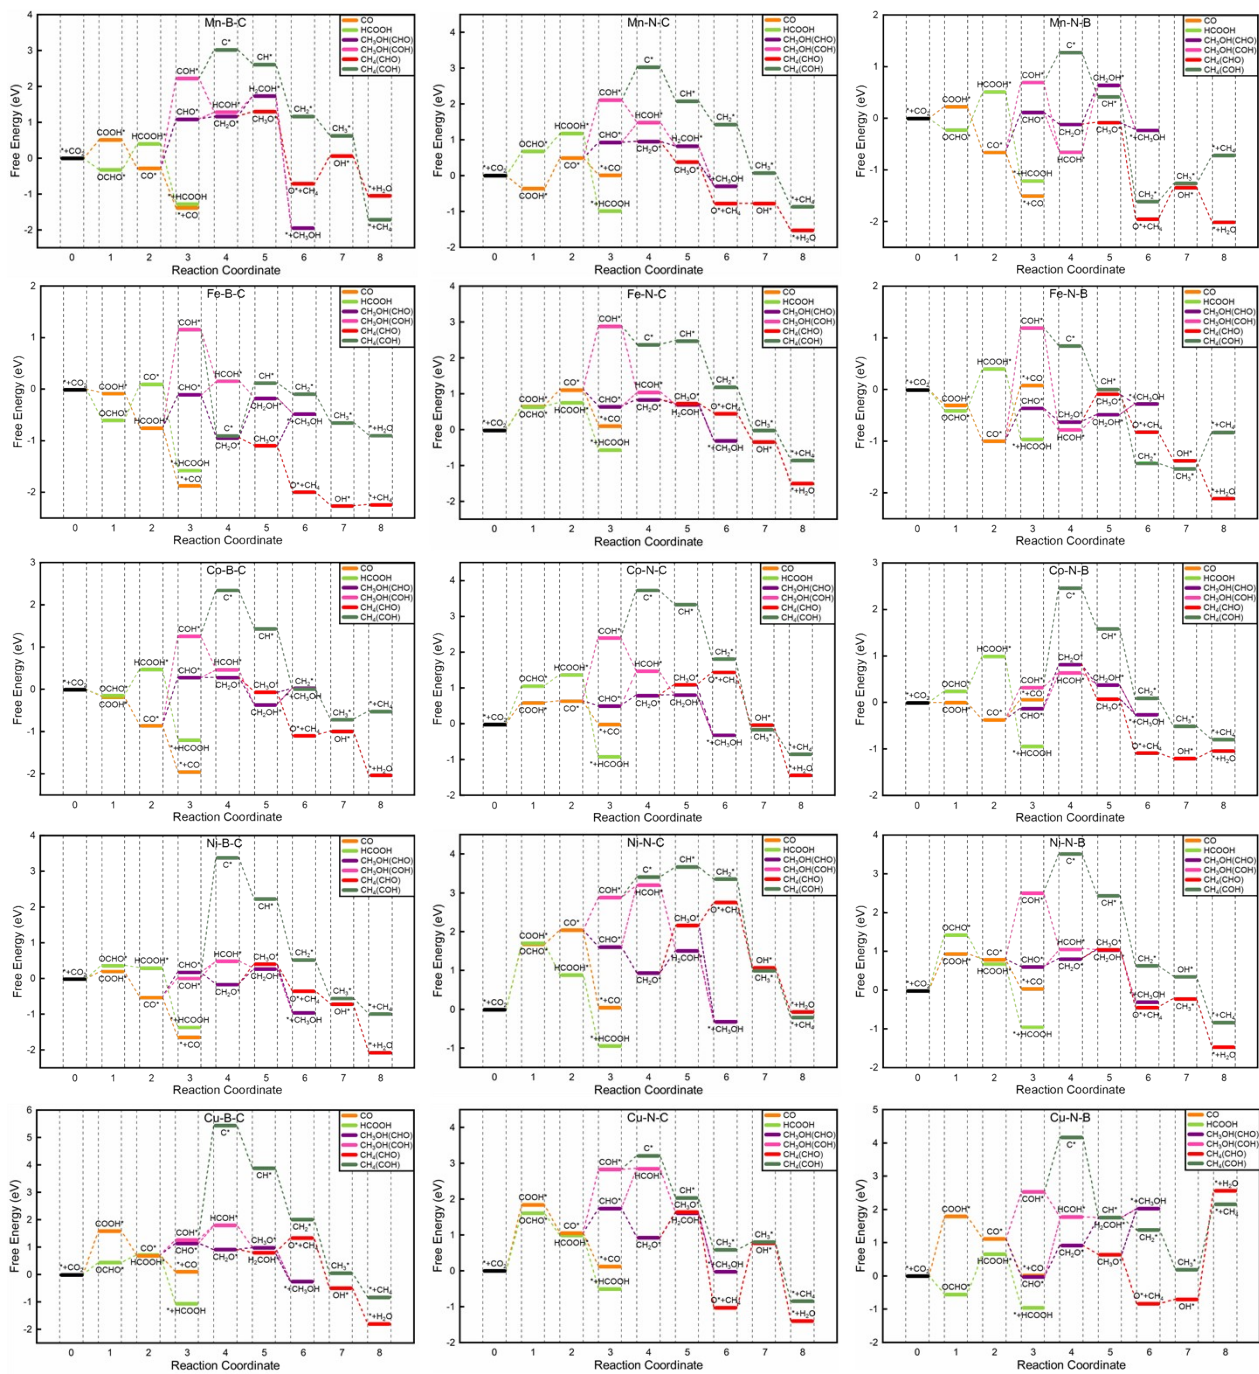

**Figure S4.** The free energy diagrams of the CO<sub>2</sub>RR reaction coordinate for the M–B–C, M–N–C and M–N–B (M = Mn, Fe, Co, Ni, Cu) active moieties.

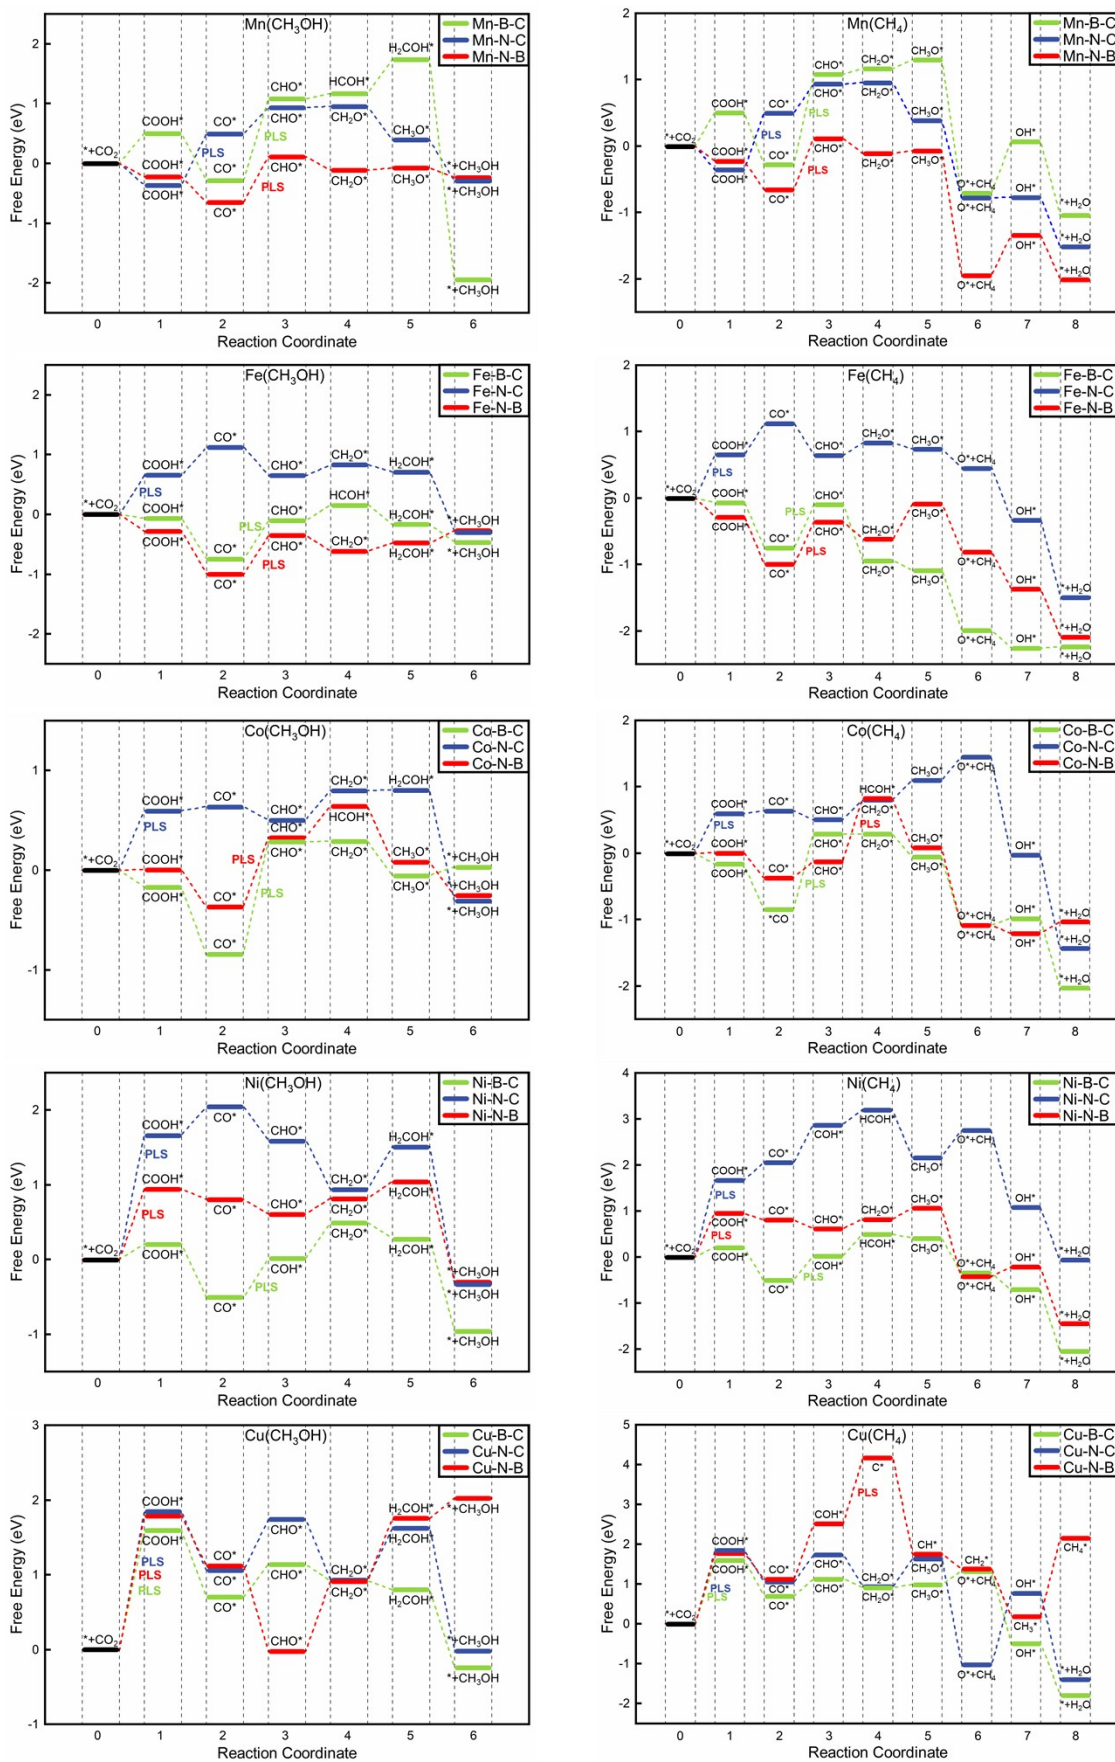

**Figure S5.** Optimal reaction coordinates for the production of  $\text{CH}_3\text{OH}$  and  $\text{CH}_4$  from metal center atoms  $M$  ( $M = \text{Mn, Fe, Co, Ni, and Cu}$ ) with different coordination environments.

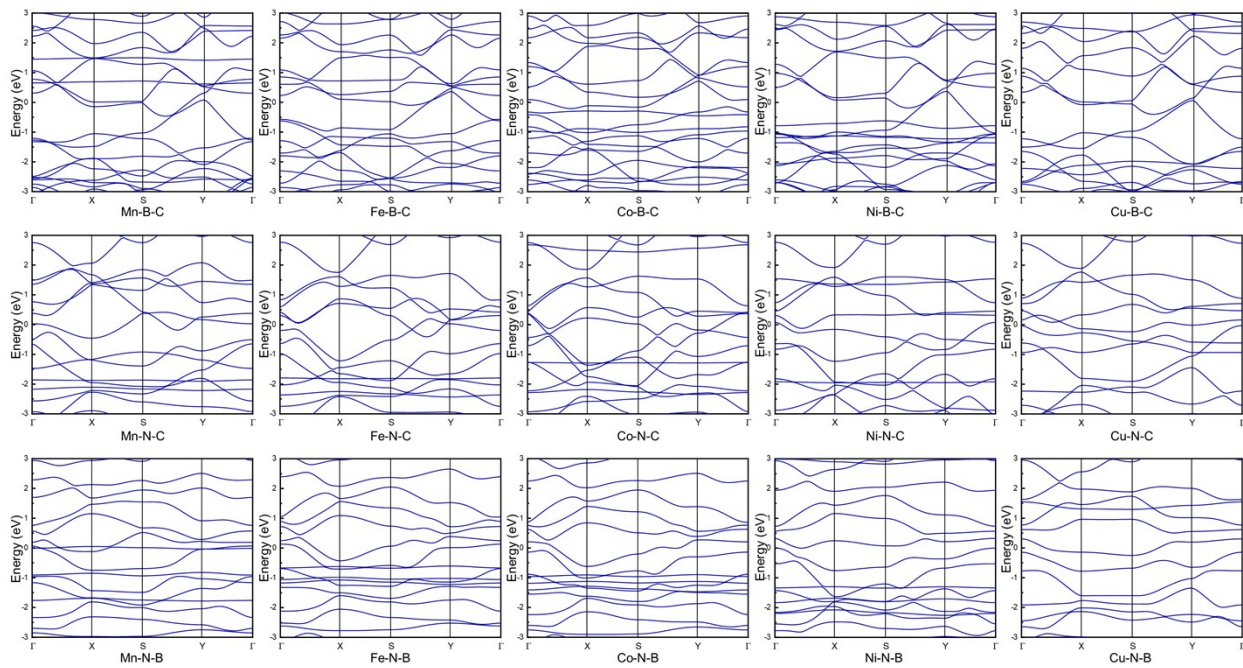

**Figure S6.** The solid-state electron-energy band diagrams for the M–B–C, M–N–C, and M–N–B-modified BPN monolayers.



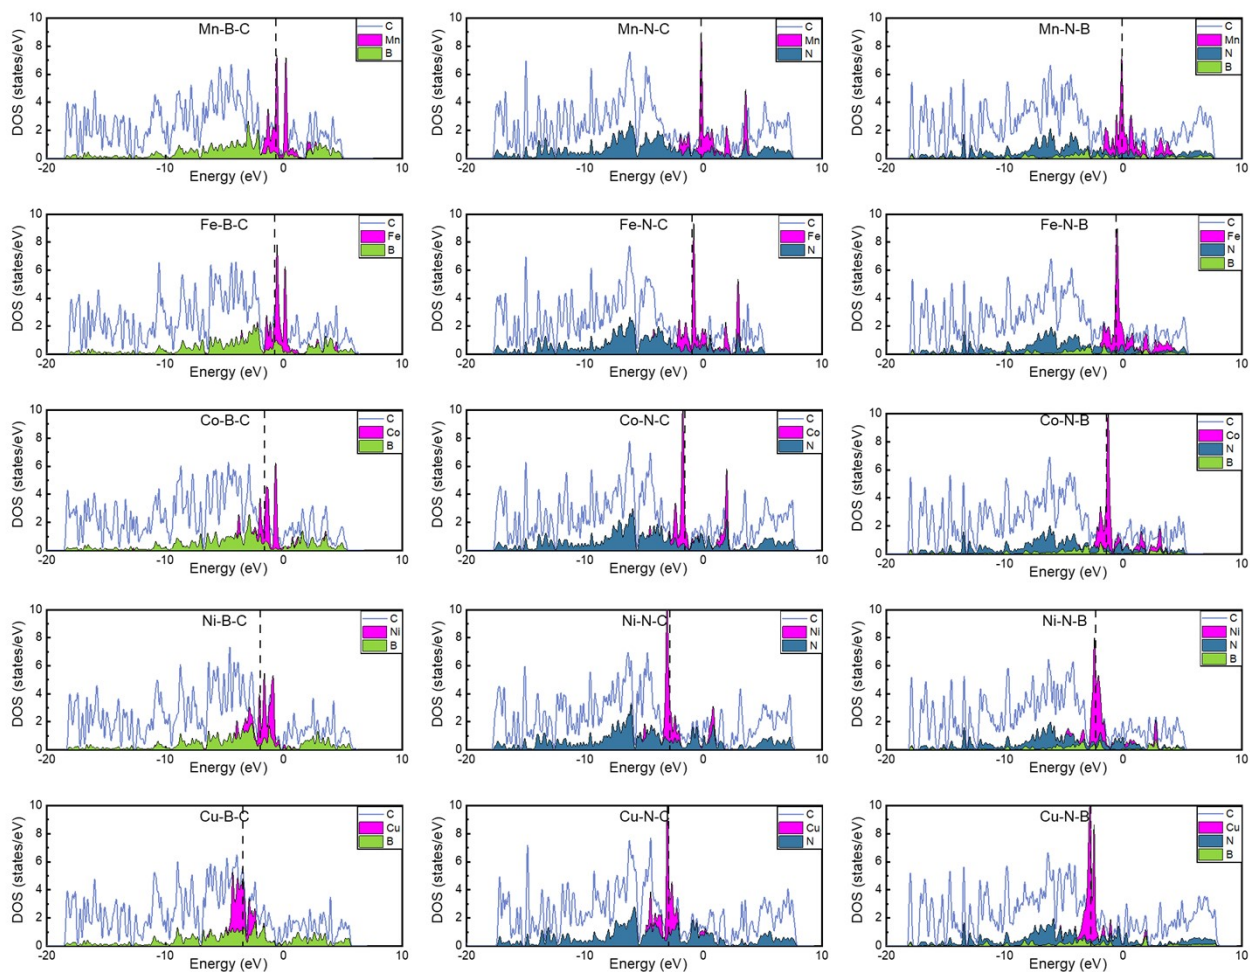

**Figure S7.** The projected DOS of the M–B–C, M–N–C, and M–N–B active moieties featuring the centers of electric-energy bands originated from d-AOs of the M atoms marked by vertical dotted lines.

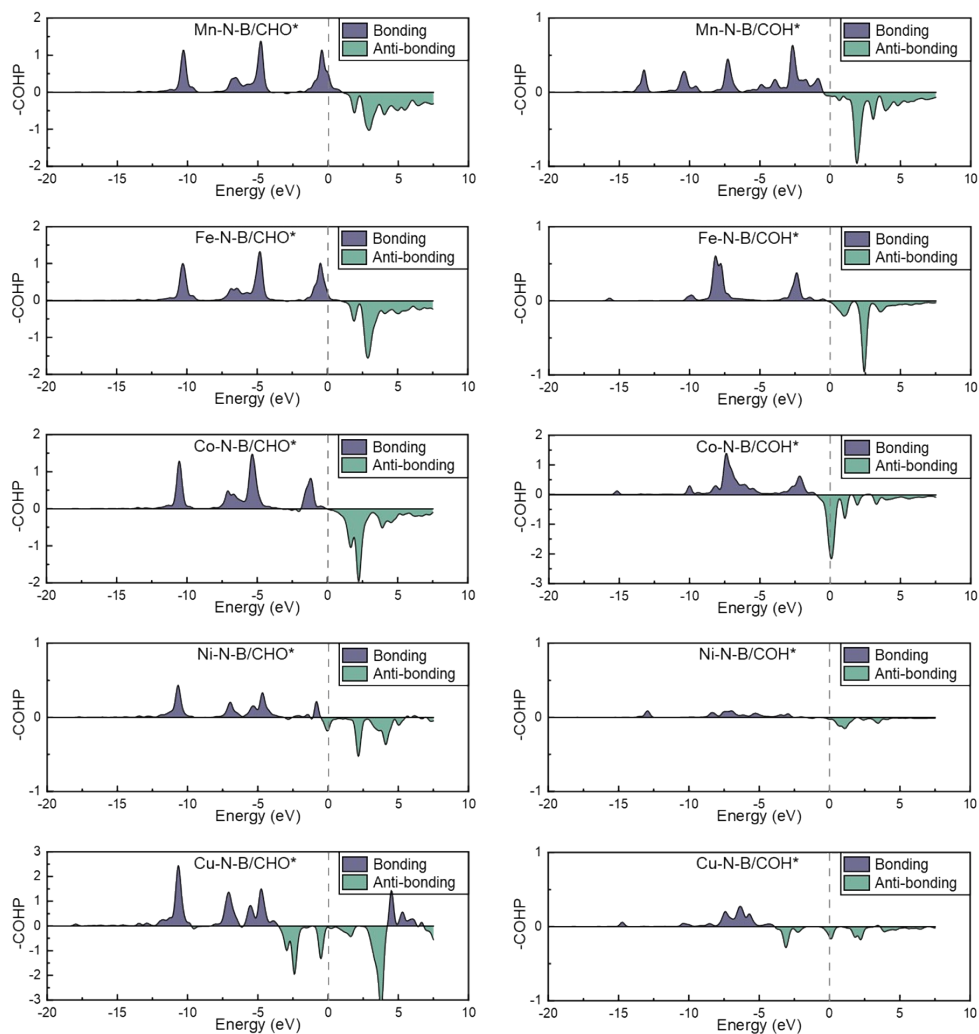

**Figure S8.** The COHP diagrams for the M–N–B active moieties with adsorbed CHO\* and COH\*. Color code: purple, bonding states; green, antibonding states.

## 2. Tables

**Table S1.** Calculated energy, zero-point energy correction, enthalpy correction, and entropy contribution of free molecules, eV.

| Species            | E      | ZPE  | $\int C_p dT$ | TS   |
|--------------------|--------|------|---------------|------|
| CO <sub>2</sub>    | -23.31 | 0.31 | 0.10          | 0.66 |
| CO                 | -15.26 | 0.13 | 0.09          | 0.61 |
| HCOOH              | -29.71 | 0.88 | 0.11          | 0.86 |
| CH <sub>3</sub> OH | -29.75 | 1.39 | 0.11          | 0.82 |
| CH <sub>4</sub>    | -23.45 | 1.20 | 0.10          | 0.60 |
| H <sub>2</sub> O   | -14.33 | 0.57 | 0.10          | 0.67 |
| H <sub>2</sub>     | -6.91  | 0.27 | 0.09          | 0.40 |

**Table S2.** Calculated energy, zero-point energy correction, enthalpy correction, and entropy contribution of adsorbed molecules, eV.

| Species            | ZPE  | $\int C_p dT$ | TS   |
|--------------------|------|---------------|------|
| COOH               | 0.62 | 0.11          | 0.22 |
| OCHO               | 0.69 | 0.10          | 0.21 |
| CO                 | 0.13 | 0.09          | 0.61 |
| HCOOH              | 0.98 | 0.11          | 0.16 |
| CHO                | 0.48 | 0.08          | 0.16 |
| COH                | 0.48 | 0.05          | 0.05 |
| C                  | 0.08 | 0.07          | 0.03 |
| CH <sub>2</sub> O  | 0.76 | 0.10          | 0.22 |
| HCOH               | 0.79 | 0.08          | 0.13 |
| CH                 | 0.35 | 0.04          | 0.07 |
| CH <sub>2</sub> OH | 1.12 | 0.08          | 0.19 |
| CH <sub>3</sub> O  | 1.10 | 0.11          | 0.18 |
| CH <sub>2</sub>    | 0.63 | 0.06          | 0.09 |
| CH <sub>3</sub>    | 0.96 | 0.07          | 0.08 |
| OH                 | 0.36 | 0.05          | 0.08 |

**Table S3.** The potential limiting step and corresponding limiting potential  $U_L$  (V) of the  $\text{CO}_2\text{RR}$  on the M–N–C, M–B–C, and M–N–B active moieties <sup>a</sup>.

| Active moiety | Products               | PLS                                                                                  | $U_L$ |
|---------------|------------------------|--------------------------------------------------------------------------------------|-------|
| Mn–N–C        | CO                     | $\text{COOH}^* + \text{H}^+ + \text{e}^- \rightarrow \text{CO}^*$                    | -0.85 |
|               | HCOOH                  | $\text{CO}_2 + * + \text{H}^+ + \text{e}^- \rightarrow \text{OHCO}^*$                | -0.67 |
|               | $\text{CH}_3\text{OH}$ | $\text{COOH}^* + \text{H}^+ + \text{e}^- \rightarrow \text{CO}^*$                    | -0.85 |
|               | $\text{CH}_4$          | $\text{COOH}^* + \text{H}^+ + \text{e}^- \rightarrow \text{CO}^*$                    | -0.85 |
| Fe–N–C        | CO                     | $\text{CO}_2 + * + \text{H}^+ + \text{e}^- \rightarrow \text{COOH}^*$                | -0.66 |
|               | HCOOH                  | $\text{CO}_2 + * + \text{H}^+ + \text{e}^- \rightarrow \text{OHCO}^*$                | -0.65 |
|               | $\text{CH}_3\text{OH}$ | $\text{CO}_2 + * + \text{H}^+ + \text{e}^- \rightarrow \text{COOH}^*$                | -0.66 |
|               | $\text{CH}_4$          | $\text{CO}_2 + * + \text{H}^+ + \text{e}^- \rightarrow \text{COOH}^*$                | -0.66 |
| Co–N–C        | CO                     | $\text{CO}_2 + * + \text{H}^+ + \text{e}^- \rightarrow \text{COOH}^*$                | -0.60 |
|               | HCOOH                  | $\text{CO}_2 + * + \text{H}^+ + \text{e}^- \rightarrow \text{OHCO}^*$                | -1.06 |
|               | $\text{CH}_3\text{OH}$ | $\text{CO}_2 + * + \text{H}^+ + \text{e}^- \rightarrow \text{COOH}^*$                | -0.60 |
|               | $\text{CH}_4$          | $\text{CO}_2 + * + \text{H}^+ + \text{e}^- \rightarrow \text{COOH}^*$                | -0.60 |
| Ni–N–C        | CO                     | $\text{CO}_2 + * + \text{H}^+ + \text{e}^- \rightarrow \text{COOH}^*$                | -1.67 |
|               | HCOOH                  | $\text{CO}_2 + * + \text{H}^+ + \text{e}^- \rightarrow \text{OHCO}^*$                | -1.69 |
|               | $\text{CH}_3\text{OH}$ | $\text{CO}_2 + * + \text{H}^+ + \text{e}^- \rightarrow \text{COOH}^*$                | -1.67 |
|               | $\text{CH}_4$          | $\text{CO}_2 + * + \text{H}^+ + \text{e}^- \rightarrow \text{COOH}^*$                | -1.67 |
| Cu–N–C        | CO                     | $\text{CO}_2 + * + \text{H}^+ + \text{e}^- \rightarrow \text{COOH}^*$                | -1.85 |
|               | HCOOH                  | $\text{CO}_2 + * + \text{H}^+ + \text{e}^- \rightarrow \text{OHCO}^*$                | -1.61 |
|               | $\text{CH}_3\text{OH}$ | $\text{CO}_2 + * + \text{H}^+ + \text{e}^- \rightarrow \text{COOH}^*$                | -1.85 |
|               | $\text{CH}_4$          | $\text{CO}_2 + * + \text{H}^+ + \text{e}^- \rightarrow \text{COOH}^*$                | -1.85 |
| Mn–B–C        | CO                     | $\text{CO}_2 + * + \text{H}^+ + \text{e}^- \rightarrow \text{COOH}^*$                | -0.50 |
|               | HCOOH                  | $\text{OHCO}^* + \text{H}^+ + \text{e}^- \rightarrow \text{HCOOH}^*$                 | -0.74 |
|               | $\text{CH}_3\text{OH}$ | $\text{CO}^* + \text{H}^+ + \text{e}^- \rightarrow \text{CHO}^*$                     | -1.37 |
|               | $\text{CH}_4$          | $\text{CO}^* + \text{H}^+ + \text{e}^- \rightarrow \text{CHO}^*$                     | -1.37 |
| Fe–B–C        | CO                     | $\text{CO}_2 + * + \text{H}^+ + \text{e}^- \rightarrow \text{COOH}^*$                | 0.07  |
|               | HCOOH                  | $\text{OHCO}^* + \text{H}^+ + \text{e}^- \rightarrow \text{HCOOH}^*$                 | -0.69 |
|               | $\text{CH}_3\text{OH}$ | $\text{CH}_2\text{O}^* + \text{H}^+ + \text{e}^- \rightarrow \text{CH}_2\text{OH}^*$ | -0.77 |
|               | $\text{CH}_4$          | $\text{CO}^* + \text{H}^+ + \text{e}^- \rightarrow \text{CHO}^*$                     | -0.65 |
| Co–B–C        | CO                     | $\text{CO}_2 + * + \text{H}^+ + \text{e}^- \rightarrow \text{COOH}^*$                | 0.17  |
|               | HCOOH                  | $\text{OHCO}^* + \text{H}^+ + \text{e}^- \rightarrow \text{HCOOH}^*$                 | -0.62 |
|               | $\text{CH}_3\text{OH}$ | $\text{CO}^* + \text{H}^+ + \text{e}^- \rightarrow \text{CHO}^*$                     | -1.13 |

|        |                    |                                                               |       |
|--------|--------------------|---------------------------------------------------------------|-------|
|        | CH <sub>4</sub>    | CO* + H <sup>+</sup> + e <sup>-</sup> → CHO*                  | -1.13 |
| Ni-B-C | CO                 | CO <sub>2</sub> + * + H <sup>+</sup> + e <sup>-</sup> → COOH* | -0.21 |
|        | HCOOH              | CO <sub>2</sub> + * + H <sup>+</sup> + e <sup>-</sup> → OHCO* | -0.37 |
|        | CH <sub>3</sub> OH | CO* + H <sup>+</sup> + e <sup>-</sup> → CHO*                  | -0.69 |
|        | CH <sub>4</sub>    | CO* + H <sup>+</sup> + e <sup>-</sup> → CHO*                  | -0.69 |
| Cu-B-C | CO                 | CO <sub>2</sub> + * + H <sup>+</sup> + e <sup>-</sup> → COOH* | -1.60 |
|        | HCOOH              | CO <sub>2</sub> + * + H <sup>+</sup> + e <sup>-</sup> → OHCO* | -0.44 |
|        | CH <sub>3</sub> OH | CO <sub>2</sub> + * + H <sup>+</sup> + e <sup>-</sup> → COOH* | -1.60 |
|        | CH <sub>4</sub>    | CO <sub>2</sub> + * + H <sup>+</sup> + e <sup>-</sup> → COOH* | -1.60 |
| Mn-N-B | CO                 | CO <sub>2</sub> + * + H <sup>+</sup> + e <sup>-</sup> → COOH* | 0.23  |
|        | HCOOH              | OHCO* + H <sup>+</sup> + e <sup>-</sup> → HCOOH*              | -0.73 |
|        | CH <sub>3</sub> OH | CO* + H <sup>+</sup> + e <sup>-</sup> → CHO*                  | -0.77 |
|        | CH <sub>4</sub>    | CO* + H <sup>+</sup> + e <sup>-</sup> → CHO*                  | -0.77 |
| Fe-N-B | CO                 | CO* → CO + *                                                  | -1.08 |
|        | HCOOH              | OHCO* + H <sup>+</sup> + e <sup>-</sup> → HCOOH*              | -0.80 |
|        | CH <sub>3</sub> OH | CO* + H <sup>+</sup> + e <sup>-</sup> → CHO*                  | -0.63 |
|        | CH <sub>4</sub>    | CO* + H <sup>+</sup> + e <sup>-</sup> → CHO*                  | -0.63 |
| Co-N-B | CO                 | CO* → CO + *                                                  | -0.44 |
|        | HCOOH              | OHCO* + H <sup>+</sup> + e <sup>-</sup> → HCOOH*              | -0.76 |
|        | CH <sub>3</sub> OH | CO* + H <sup>+</sup> + e <sup>-</sup> → COH*                  | -0.69 |
|        | CH <sub>4</sub>    | CHO* + H <sup>+</sup> + e <sup>-</sup> → CH <sub>2</sub> O*   | -0.94 |
| Ni-N-B | CO                 | CO <sub>2</sub> + * + H <sup>+</sup> + e <sup>-</sup> → COOH* | -0.95 |
|        | HCOOH              | CO <sub>2</sub> + * + H <sup>+</sup> + e <sup>-</sup> → OHCO* | -1.43 |
|        | CH <sub>3</sub> OH | CO <sub>2</sub> + * + H <sup>+</sup> + e <sup>-</sup> → COOH* | -0.95 |
|        | CH <sub>4</sub>    | CO <sub>2</sub> + * + H <sup>+</sup> + e <sup>-</sup> → COOH* | -0.95 |
| Cu-N-B | CO                 | CO <sub>2</sub> + * + H <sup>+</sup> + e <sup>-</sup> → COOH* | -1.79 |
|        | HCOOH              | OHCO* + H <sup>+</sup> + e <sup>-</sup> → HCOOH*              | -1.21 |
|        | CH <sub>3</sub> OH | CO <sub>2</sub> + * + H <sup>+</sup> + e <sup>-</sup> → COOH* | -1.79 |
|        | CH <sub>4</sub>    | COH* + H <sup>+</sup> + e <sup>-</sup> → C*                   | -1.97 |

<sup>a</sup> Symbol \* denotes adsorption / adsorbed state.

**Table S4.** Bader charges and CTs in the M–N–E-modified BPN frameworks, e.

| Triad | M  | Bader charge | Original charge | Bader CT difference |
|-------|----|--------------|-----------------|---------------------|
| M–B–C | Mn | 12.43        | 13              | -0.57               |
|       | Fe | 7.70         | 8               | -0.30               |
|       | Co | 8.97         | 9               | -0.03               |
|       | Ni | 10.08        | 10              | 0.08                |
|       | Cu | 10.92        | 11              | -0.08               |
| M–N–C | Mn | 11.78        | 13              | -1.22               |
|       | Fe | 7.00         | 8               | -1.00               |
|       | Co | 8.05         | 9               | -0.95               |
|       | Ni | 9.10         | 10              | -0.90               |
|       | Cu | 10.06        | 11              | -0.94               |
| M–N–B | Mn | 11.93        | 13              | -1.07               |
|       | Fe | 7.24         | 8               | -0.76               |
|       | Co | 8.42         | 9               | -0.58               |
|       | Ni | 9.46         | 10              | -0.54               |
|       | Cu | 10.34        | 11              | -0.66               |

**Table S5.** The bonding energy for hydrogen adsorption of various active moieties in M–B–C, M–N–C and M–N–B (M= Mn, Fe, Co, Ni, Cu), eV.

|    | M–B–C | M–N–C | M–N–B |
|----|-------|-------|-------|
| Mn | -4.83 | -2.08 | -0.97 |
| Fe | -4.11 | -3.79 | -0.97 |
| Co | -2.80 | -2.14 | -0.51 |
| Ni | -2.03 | -0.19 | 0.58  |
| Cu | -1.57 | 2.08  | 0.59  |

**Table S6.** The optimized configurations and Gibbs free energy  $\Delta G$  (eV) of reactants and intermediates adsorbed at the Fe–N–B active site, as well as the SBIs lengths between intermediates and B (Å) <sup>a</sup>.

| Reactants / intermediates |                     | Optimized configurations                                                            |                                                                                     | $\Delta G$ | SBIs |
|---------------------------|---------------------|-------------------------------------------------------------------------------------|-------------------------------------------------------------------------------------|------------|------|
|                           | COOH*               | 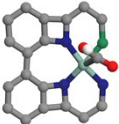   |    | -0.28      | 1.93 |
| CO                        | CO*                 |    |    | -0.99      | 2.11 |
|                           | *+CO                |    |    | 0.09       | -    |
|                           |                     |                                                                                     |                                                                                     |            |      |
|                           | OCHO*               |   |  | -0.40      | 1.45 |
| HCOOH                     | HCOOH*              |  |  | 0.40       | 2.67 |
|                           | *+HCOOH             |  |  | -0.95      | -    |
|                           | CHO*                |  |  | -0.36      | 1.91 |
| CH <sub>3</sub> OH        | CH <sub>2</sub> O*  |  |  | -0.61      | 1.80 |
|                           | CH <sub>2</sub> OH* |  |  | -0.48      | 1.76 |



|                 |                      |                                                                                   |                                                                                   |       |      |
|-----------------|----------------------|-----------------------------------------------------------------------------------|-----------------------------------------------------------------------------------|-------|------|
|                 | *+CH <sub>3</sub> OH | 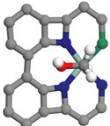 |  | -0.27 | -    |
|                 | OCH <sub>3</sub>     |  |  | -0.08 | 2.65 |
| CH <sub>4</sub> | O*+CH <sub>4</sub>   |  |  | -0.81 | 1.34 |
|                 | OH*                  |  |  | -1.37 | 2.44 |
|                 | *+H <sub>2</sub> O   |  |  | -2.10 | -    |

<sup>a</sup> Color code: C gray, H white, B green, N blue, O red, Fe cyan.
